# Supplementary material
Source: MDPI journal article supplement (https://www.mdpi.com/2073-4441/16/1/5)
Supplement: s1 [file s1]

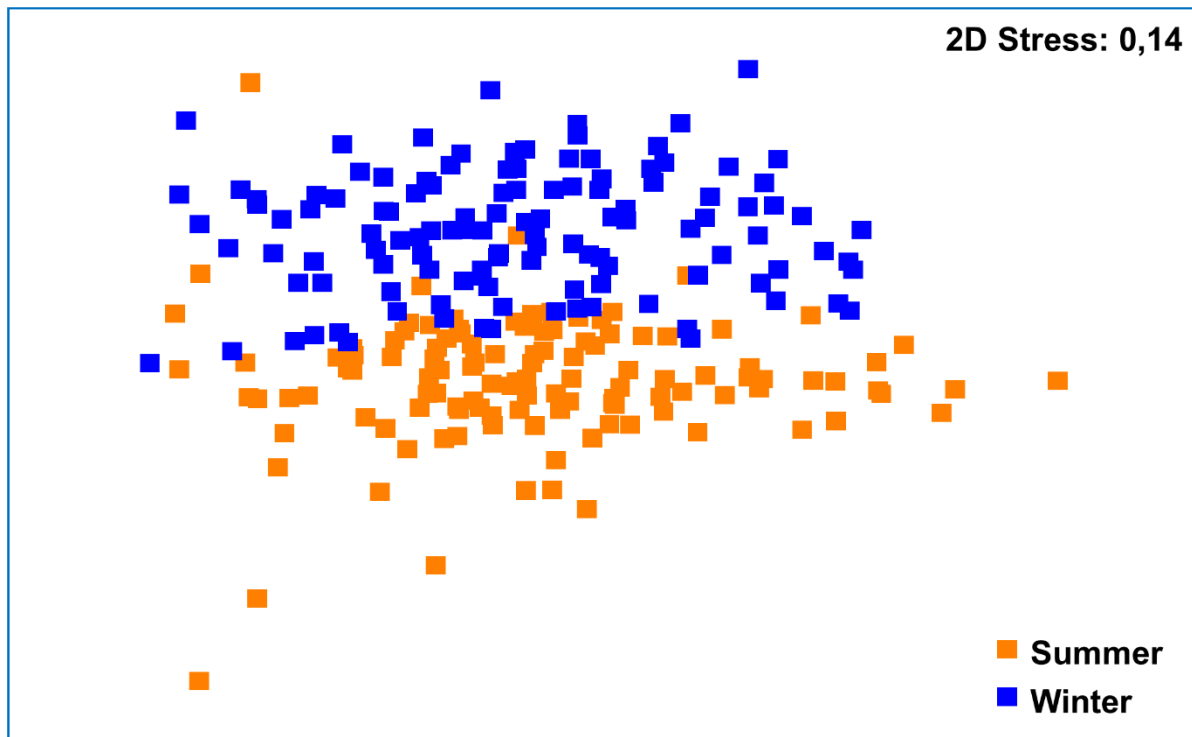

**Figure S1.** Non-metric MDS ordination plot of enzymatic activities and biometric variables of all organisms sampled in the four sites on the Northern Portuguese Atlantic coast shows the separation among seasons (Summer vs Winter).

Total variation is 1827.000, explanatory variables account for 14.88%

Summary Table:

| Statistic                               | Axis 1       | Axis 2       | Axis 3 | Axis 4 |
|-----------------------------------------|--------------|--------------|--------|--------|
| Eigenvalues                             | 0.0986       | 0.0429       | 0.0053 | 0.0021 |
| Explained variation (cumulative)        | 9.86         | 14.15        | 14.68  | 14.88  |
| Pseudo-canonical correlation            | 0.6428       | 0.6258       | 0.2661 | 0.1225 |
| Explained fitted variation (cumulative) | <b>66.23</b> | <b>95.06</b> | 98.61  | 100.00 |
| Pseudo-canonical correlation (suppl.)   | 0.8154       | 0.4914       | 0.3928 | 0.4140 |

Permutation Test Results:

On First Axis pseudo-F=5.4, P=0.001

On All Axes pseudo-F=8.7, P=0.001

**Variation Partitioning Results for Two Groups (time and space) Simple-effects-tested**

Group Members:

First Group      Second Group

a) Season      b) Sampling site

| Fraction                   | Variation (adj) | % of Explained | % of All | DF      | Mean Square                |
|----------------------------|-----------------|----------------|----------|---------|----------------------------|
| a                          | 0.12719         | 58.5           | 12.7     | 1       | 0.12919                    |
| b                          | 0.093509        | 43.0           | 9.4      | 3       | 0.03493                    |
| c                          | -0.0032184      | -1.5           | -0.3     | --      | --                         |
| Total Explained<br>0.21748 | 100.0           | 21.7           | 4        | 0.05828 | Total Explained<br>0.21748 |
| All Variation              | 1               | --             | 100.0    | 200     | --                         |

| Tested Fraction | F    | P     |
|-----------------|------|-------|
| a+b+c           | 14.9 | 0.001 |
| a+c             | 29.3 | 0.001 |
| b+c             | 7.6  | 0.001 |

### Variation Partitioning Results for Two Groups (physicochemical parameters and specific pollutants) Simple-effects-tested

Group Members: **a)** physicochemical parameters (PC)

**b)** specific pollutants. (SP)

First Group      Second Group

TSS                      Cd

NH<sub>3</sub>                      Pb

Na                        Cu

### Explained variation

| Fraction        | Variation (adj) | % of Explained | % of All | DF  | Mean Square |
|-----------------|-----------------|----------------|----------|-----|-------------|
| a               | 0.0076451       | 5.8            | 0.8      | 3   | 0.00394     |
| b               | 0.0014431       | 1.1            | 0.1      | 3   | 0.00191     |
| c               | 0.12255         | 93.1           | 12.3     | --  | --          |
| Total Explained | 0.13164         | 100.0          | 13.2     | 4   | 0.03721     |
| All Variation   | 1               | --             | 100.0    | 202 | --          |
